# Supplementary material for: Perspectives on recovery from older adult trauma survivors living in rural areas
Source: HighWire-hosted journal article supplement (doi:10.1136/tsaco-2021-000881), 2022-03-01
Supplement: tsaco-2021-000881supp001_data_supplement.pdf [file tsaco-2021-000881supp001_data_supplement.pdf]

## Perspectives on Recovery from Older Adult Trauma Survivors Living in Rural Areas Themes and Proposed Solutions for Patients and Providers

Discharge transitions

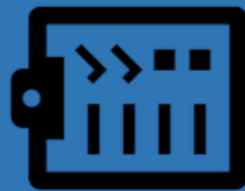

▶ Provide telemedicine and primary care follow-ups

Loss of control

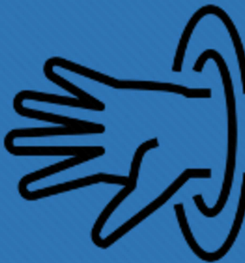

▶ Counsel about post-injury adjustment

Rural insights  
(access)

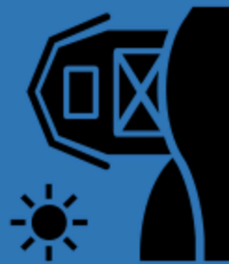

▶ Refer to local physical and occupational therapy

Self-efficacy

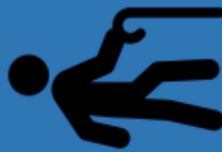

▶ Empower support system
